# Supplementary material for: The Mucosal Barrier and Anti-Viral Immune Responses can Eliminate Portions of the Viral Population during Transmission and Early Viral Growth
Source: Preprints.org preprint supplement (doi:10.20944/preprints202105.0206.v1), 2021-05-10
Supplement: Supplementary file 1 [file TableS1.xlsx]

## Sheet: Sheet1
	RT-PCR primers					PCR Primers
Animal	Days Post Infection	F Primer Name	F Primer Sequence	R Primer Name	R Primer Sequence	F Primer Name	F Primer CS Tag	F Primer Sequence	R Primer Name	R Primer CS Tag	R Primer Sequence
cy0428	3	5942F	CAAGAAAGGCTGTAGATGTC	8193R	TGCCAAGTGTTGATTATTTGTC	6334F	ACACTGACGACATGGTTCTACA	TCTAGGGGAAGGACATGGGG	6750R	TACGGTAGCAGAGACTTGGTCT	ACTGGCAATGGTAGCAACACT
		5942F	CAAGAAAGGCTGTAGATGTC	8193R	TGCCAAGTGTTGATTATTTGTC	6334F	TACGGTAGCAGAGACTTGGTCT	TCTAGGGGAAGGACATGGGG	6750R	ACACTGACGACATGGTTCTACA	ACTGGCAATGGTAGCAACACT
	7	5942F	CAAGAAAGGCTGTAGATGTC	8193R	TGCCAAGTGTTGATTATTTGTC	6334F	ACACTGACGACATGGTTCTACA	TCTAGGGGAAGGACATGGGG	6750R	TACGGTAGCAGAGACTTGGTCT	ACTGGCAATGGTAGCAACACT
		5942F	CAAGAAAGGCTGTAGATGTC	8193R	TGCCAAGTGTTGATTATTTGTC	6334F	TACGGTAGCAGAGACTTGGTCT	TCTAGGGGAAGGACATGGGG	6750R	ACACTGACGACATGGTTCTACA	ACTGGCAATGGTAGCAACACT
	10	5942F	CAAGAAAGGCTGTAGATGTC	8193R	TGCCAAGTGTTGATTATTTGTC	6334F	ACACTGACGACATGGTTCTACA	TCTAGGGGAAGGACATGGGG	6750R	TACGGTAGCAGAGACTTGGTCT	ACTGGCAATGGTAGCAACACT
		5942F	CAAGAAAGGCTGTAGATGTC	8193R	TGCCAAGTGTTGATTATTTGTC	6334F	TACGGTAGCAGAGACTTGGTCT	TCTAGGGGAAGGACATGGGG	6750R	ACACTGACGACATGGTTCTACA	ACTGGCAATGGTAGCAACACT
	14	5942F	CAAGAAAGGCTGTAGATGTC	8193R	TGCCAAGTGTTGATTATTTGTC	6334F	ACACTGACGACATGGTTCTACA	TCTAGGGGAAGGACATGGGG	6750R	TACGGTAGCAGAGACTTGGTCT	ACTGGCAATGGTAGCAACACT
		5942F	CAAGAAAGGCTGTAGATGTC	8193R	TGCCAAGTGTTGATTATTTGTC	6334F	TACGGTAGCAGAGACTTGGTCT	TCTAGGGGAAGGACATGGGG	6750R	ACACTGACGACATGGTTCTACA	ACTGGCAATGGTAGCAACACT
	17	5942F	CAAGAAAGGCTGTAGATGTC	8193R	TGCCAAGTGTTGATTATTTGTC	6334F	ACACTGACGACATGGTTCTACA	TCTAGGGGAAGGACATGGGG	6750R	TACGGTAGCAGAGACTTGGTCT	ACTGGCAATGGTAGCAACACT
		5942F	CAAGAAAGGCTGTAGATGTC	8193R	TGCCAAGTGTTGATTATTTGTC	6334F	TACGGTAGCAGAGACTTGGTCT	TCTAGGGGAAGGACATGGGG	6750R	ACACTGACGACATGGTTCTACA	ACTGGCAATGGTAGCAACACT
	21	5942F	CAAGAAAGGCTGTAGATGTC	8193R	TGCCAAGTGTTGATTATTTGTC	6334F	ACACTGACGACATGGTTCTACA	TCTAGGGGAAGGACATGGGG	6750R	TACGGTAGCAGAGACTTGGTCT	ACTGGCAATGGTAGCAACACT
		5942F	CAAGAAAGGCTGTAGATGTC	8193R	TGCCAAGTGTTGATTATTTGTC	6334F	TACGGTAGCAGAGACTTGGTCT	TCTAGGGGAAGGACATGGGG	6750R	ACACTGACGACATGGTTCTACA	ACTGGCAATGGTAGCAACACT
	24	5942F	CAAGAAAGGCTGTAGATGTC	8193R	TGCCAAGTGTTGATTATTTGTC	6334F	ACACTGACGACATGGTTCTACA	TCTAGGGGAAGGACATGGGG	6750R	TACGGTAGCAGAGACTTGGTCT	ACTGGCAATGGTAGCAACACT
		5942F	CAAGAAAGGCTGTAGATGTC	8193R	TGCCAAGTGTTGATTATTTGTC	6334F	TACGGTAGCAGAGACTTGGTCT	TCTAGGGGAAGGACATGGGG	6750R	ACACTGACGACATGGTTCTACA	ACTGGCAATGGTAGCAACACT
	28	5942F	CAAGAAAGGCTGTAGATGTC	8193R	TGCCAAGTGTTGATTATTTGTC	6334F	ACACTGACGACATGGTTCTACA	TCTAGGGGAAGGACATGGGG	6750R	TACGGTAGCAGAGACTTGGTCT	ACTGGCAATGGTAGCAACACT
		5942F	CAAGAAAGGCTGTAGATGTC	8193R	TGCCAAGTGTTGATTATTTGTC	6334F	TACGGTAGCAGAGACTTGGTCT	TCTAGGGGAAGGACATGGGG	6750R	ACACTGACGACATGGTTCTACA	ACTGGCAATGGTAGCAACACT
	42	5942F	CAAGAAAGGCTGTAGATGTC	8193R	TGCCAAGTGTTGATTATTTGTC	6334F	ACACTGACGACATGGTTCTACA	TCTAGGGGAAGGACATGGGG	6750R	TACGGTAGCAGAGACTTGGTCT	ACTGGCAATGGTAGCAACACT
		5942F	CAAGAAAGGCTGTAGATGTC	8193R	TGCCAAGTGTTGATTATTTGTC	6334F	TACGGTAGCAGAGACTTGGTCT	TCTAGGGGAAGGACATGGGG	6750R	ACACTGACGACATGGTTCTACA	ACTGGCAATGGTAGCAACACT
	56	5942F	CAAGAAAGGCTGTAGATGTC	8193R	TGCCAAGTGTTGATTATTTGTC	6334F	ACACTGACGACATGGTTCTACA	TCTAGGGGAAGGACATGGGG	6750R	TACGGTAGCAGAGACTTGGTCT	ACTGGCAATGGTAGCAACACT
		5942F	CAAGAAAGGCTGTAGATGTC	8193R	TGCCAAGTGTTGATTATTTGTC	6334F	TACGGTAGCAGAGACTTGGTCT	TCTAGGGGAAGGACATGGGG	6750R	ACACTGACGACATGGTTCTACA	ACTGGCAATGGTAGCAACACT
	70	5942F	CAAGAAAGGCTGTAGATGTC	8193R	TGCCAAGTGTTGATTATTTGTC	6334F	ACACTGACGACATGGTTCTACA	TCTAGGGGAAGGACATGGGG	6750R	TACGGTAGCAGAGACTTGGTCT	ACTGGCAATGGTAGCAACACT
		5942F	CAAGAAAGGCTGTAGATGTC	8193R	TGCCAAGTGTTGATTATTTGTC	6334F	TACGGTAGCAGAGACTTGGTCT	TCTAGGGGAAGGACATGGGG	6750R	ACACTGACGACATGGTTCTACA	ACTGGCAATGGTAGCAACACT
	84	5942F	CAAGAAAGGCTGTAGATGTC	8193R	TGCCAAGTGTTGATTATTTGTC	6334F	ACACTGACGACATGGTTCTACA	TCTAGGGGAAGGACATGGGG	6750R	TACGGTAGCAGAGACTTGGTCT	ACTGGCAATGGTAGCAACACT
		5942F	CAAGAAAGGCTGTAGATGTC	8193R	TGCCAAGTGTTGATTATTTGTC	6334F	TACGGTAGCAGAGACTTGGTCT	TCTAGGGGAAGGACATGGGG	6750R	ACACTGACGACATGGTTCTACA	ACTGGCAATGGTAGCAACACT
cy0575	3	5942F	CAAGAAAGGCTGTAGATGTC	8193R	TGCCAAGTGTTGATTATTTGTC	6334F	ACACTGACGACATGGTTCTACA	TCTAGGGGAAGGACATGGGG	6750R	TACGGTAGCAGAGACTTGGTCT	ACTGGCAATGGTAGCAACACT
		5942F	CAAGAAAGGCTGTAGATGTC	8193R	TGCCAAGTGTTGATTATTTGTC	6334F	TACGGTAGCAGAGACTTGGTCT	TCTAGGGGAAGGACATGGGG	6750R	ACACTGACGACATGGTTCTACA	ACTGGCAATGGTAGCAACACT
	7	5942F	CAAGAAAGGCTGTAGATGTC	8193R	TGCCAAGTGTTGATTATTTGTC	6334F	ACACTGACGACATGGTTCTACA	TCTAGGGGAAGGACATGGGG	6750R	TACGGTAGCAGAGACTTGGTCT	ACTGGCAATGGTAGCAACACT
	10	5942F	CAAGAAAGGCTGTAGATGTC	8193R	TGCCAAGTGTTGATTATTTGTC	6334F	ACACTGACGACATGGTTCTACA	TCTAGGGGAAGGACATGGGG	6750R	TACGGTAGCAGAGACTTGGTCT	ACTGGCAATGGTAGCAACACT
		5942F	CAAGAAAGGCTGTAGATGTC	8193R	TGCCAAGTGTTGATTATTTGTC	6334F	TACGGTAGCAGAGACTTGGTCT	TCTAGGGGAAGGACATGGGG	6750R	ACACTGACGACATGGTTCTACA	ACTGGCAATGGTAGCAACACT
	14	5942F	CAAGAAAGGCTGTAGATGTC	8193R	TGCCAAGTGTTGATTATTTGTC	6334F	ACACTGACGACATGGTTCTACA	TCTAGGGGAAGGACATGGGG	6750R	TACGGTAGCAGAGACTTGGTCT	ACTGGCAATGGTAGCAACACT
		5942F	CAAGAAAGGCTGTAGATGTC	8193R	TGCCAAGTGTTGATTATTTGTC	6334F	TACGGTAGCAGAGACTTGGTCT	TCTAGGGGAAGGACATGGGG	6750R	ACACTGACGACATGGTTCTACA	ACTGGCAATGGTAGCAACACT
	17	5942F	CAAGAAAGGCTGTAGATGTC	8193R	TGCCAAGTGTTGATTATTTGTC	6334F	ACACTGACGACATGGTTCTACA	TCTAGGGGAAGGACATGGGG	6750R	TACGGTAGCAGAGACTTGGTCT	ACTGGCAATGGTAGCAACACT
	21	5942F	CAAGAAAGGCTGTAGATGTC	8193R	TGCCAAGTGTTGATTATTTGTC	6334F	TACGGTAGCAGAGACTTGGTCT	TCTAGGGGAAGGACATGGGG	6750R	ACACTGACGACATGGTTCTACA	ACTGGCAATGGTAGCAACACT
		5942F	CAAGAAAGGCTGTAGATGTC	8193R	TGCCAAGTGTTGATTATTTGTC	6334F	ACACTGACGACATGGTTCTACA	TCTAGGGGAAGGACATGGGG	6750R	TACGGTAGCAGAGACTTGGTCT	ACTGGCAATGGTAGCAACACT
	24	5942F	CAAGAAAGGCTGTAGATGTC	8193R	TGCCAAGTGTTGATTATTTGTC	6334F	TACGGTAGCAGAGACTTGGTCT	TCTAGGGGAAGGACATGGGG	6750R	ACACTGACGACATGGTTCTACA	ACTGGCAATGGTAGCAACACT
		5942F	CAAGAAAGGCTGTAGATGTC	8193R	TGCCAAGTGTTGATTATTTGTC	6334F	ACACTGACGACATGGTTCTACA	TCTAGGGGAAGGACATGGGG	6750R	TACGGTAGCAGAGACTTGGTCT	ACTGGCAATGGTAGCAACACT
	42	5942F	CAAGAAAGGCTGTAGATGTC	8193R	TGCCAAGTGTTGATTATTTGTC	6334F	TACGGTAGCAGAGACTTGGTCT	TCTAGGGGAAGGACATGGGG	6750R	ACACTGACGACATGGTTCTACA	ACTGGCAATGGTAGCAACACT
		5942F	CAAGAAAGGCTGTAGATGTC	8193R	TGCCAAGTGTTGATTATTTGTC	6334F	ACACTGACGACATGGTTCTACA	TCTAGGGGAAGGACATGGGG	6750R	TACGGTAGCAGAGACTTGGTCT	ACTGGCAATGGTAGCAACACT
	56	5942F	CAAGAAAGGCTGTAGATGTC	8193R	TGCCAAGTGTTGATTATTTGTC	6334F	TACGGTAGCAGAGACTTGGTCT	TCTAGGGGAAGGACATGGGG	6750R	ACACTGACGACATGGTTCTACA	ACTGGCAATGGTAGCAACACT
		5942F	CAAGAAAGGCTGTAGATGTC	8193R	TGCCAAGTGTTGATTATTTGTC	6334F	ACACTGACGACATGGTTCTACA	TCTAGGGGAAGGACATGGGG	6750R	TACGGTAGCAGAGACTTGGTCT	ACTGGCAATGGTAGCAACACT
	70	5942F	CAAGAAAGGCTGTAGATGTC	8193R	TGCCAAGTGTTGATTATTTGTC	6334F	TACGGTAGCAGAGACTTGGTCT	TCTAGGGGAAGGACATGGGG	6750R	ACACTGACGACATGGTTCTACA	ACTGGCAATGGTAGCAACACT
		5942F	CAAGAAAGGCTGTAGATGTC	8193R	TGCCAAGTGTTGATTATTTGTC	6334F	ACACTGACGACATGGTTCTACA	TCTAGGGGAAGGACATGGGG	6750R	TACGGTAGCAGAGACTTGGTCT	ACTGGCAATGGTAGCAACACT
	84	5942F	CAAGAAAGGCTGTAGATGTC	8193R	TGCCAAGTGTTGATTATTTGTC	6334F	TACGGTAGCAGAGACTTGGTCT	TCTAGGGGAAGGACATGGGG	6750R	ACACTGACGACATGGTTCTACA	ACTGGCAATGGTAGCAACACT
		5942F	CAAGAAAGGCTGTAGATGTC	8193R	TGCCAAGTGTTGATTATTTGTC	6334F	ACACTGACGACATGGTTCTACA	TCTAGGGGAAGGACATGGGG	6750R	TACGGTAGCAGAGACTTGGTCT	ACTGGCAATGGTAGCAACACT
r10001	7	5942F	CAAGAAAGGCTGTAGATGTC	8193R	TGCCAAGTGTTGATTTGTC	6334F	ACACTGACGACATGGTTCTACA	TCTAGGGGAAGGACATGGGG	6750R	TACGGTAGCAGAGACTTGGTCT	ACTGGCAATGGTAGCAACACT
						6248F	ACACTGACGACATGGTTCTACA	GGGATGTCACCAAGCTATGT	6747R	TACGGTAGCAGAGACTTGGTCT	GGCAATGGTAGCAACACTTTT
	14	5942F	CAAGAAAGGCTGTAGATGTC	8193R	TGCCAAGTGTTGATTTGTC	6334F	ACACTGACGACATGGTTCTACA	TCTAGGGGAAGGACATGGGG	6750R	TACGGTAGCAGAGACTTGGTCT	ACTGGCAATGGTAGCAACACT
						6248F	ACACTGACGACATGGTTCTACA	GGGATGTCACCAAGCTATGT	6747R	TACGGTAGCAGAGACTTGGTCT	GGCAATGGTAGCAACACTTTT
	21	5942F	CAAGAAAGGCTGTAGATGTC	8193R	TGCCAAGTGTTGATTTGTC	6334F	ACACTGACGACATGGTTCTACA	TCTAGGGGAAGGACATGGGG	6750R	TACGGTAGCAGAGACTTGGTCT	ACTGGCAATGGTAGCAACACT
						6248F	ACACTGACGACATGGTTCTACA	GGGATGTCACCAAGCTATGT	6747R	TACGGTAGCAGAGACTTGGTCT	GGCAATGGTAGCAACACTTTT
	28	5942F	CAAGAAAGGCTGTAGATGTC	8193R	TGCCAAGTGTTGATTTGTC	6334F	ACACTGACGACATGGTTCTACA	TCTAGGGGAAGGACATGGGG	6750R	TACGGTAGCAGAGACTTGGTCT	ACTGGCAATGGTAGCAACACT
						6248F	ACACTGACGACATGGTTCTACA	GGGATGTCACCAAGCTATGT	6747R	TACGGTAGCAGAGACTTGGTCT	GGCAATGGTAGCAACACTTTT
	42	5942F	CAAGAAAGGCTGTAGATGTC	8193R	TGCCAAGTGTTGATTTGTC	6334F	ACACTGACGACATGGTTCTACA	TCTAGGGGAAGGACATGGGG	6750R	TACGGTAGCAGAGACTTGGTCT	ACTGGCAATGGTAGCAACACT
						6248F	ACACTGACGACATGGTTCTACA	GGGATGTCACCAAGCTATGT	6747R	TACGGTAGCAGAGACTTGGTCT	GGCAATGGTAGCAACACTTTT
	56	5942F	CAAGAAAGGCTGTAGATGTC	8193R	TGCCAAGTGTTGATTTGTC	6334F	ACACTGACGACATGGTTCTACA	TCTAGGGGAAGGACATGGGG	6750R	TACGGTAGCAGAGACTTGGTCT	ACTGGCAATGGTAGCAACACT
						6248F	ACACTGACGACATGGTTCTACA	GGGATGTCACCAAGCTATGT	6747R	TACGGTAGCAGAGACTTGGTCT	GGCAATGGTAGCAACACTTTT
	70	5942F	CAAGAAAGGCTGTAGATGTC	8193R	TGCCAAGTGTTGATTTGTC	6334F	ACACTGACGACATGGTTCTACA	TCTAGGGGAAGGACATGGGG	6750R	TACGGTAGCAGAGACTTGGTCT	ACTGGCAATGGTAGCAACACT
						6248F	ACACTGACGACATGGTTCTACA	GGGATGTCACCAAGCTATGT	6747R	TACGGTAGCAGAGACTTGGTCT	GGCAATGGTAGCAACACTTTT
	84	5942F	CAAGAAAGGCTGTAGATGTC	8193R	TGCCAAGTGTTGATTTGTC	6334F	ACACTGACGACATGGTTCTACA	TCTAGGGGAAGGACATGGGG	6750R	TACGGTAGCAGAGACTTGGTCT	ACTGGCAATGGTAGCAACACT
						6248F	ACACTGACGACATGGTTCTACA	GGGATGTCACCAAGCTATGT	6747R	TACGGTAGCAGAGACTTGGTCT	GGCAATGGTAGCAACACTTTT
r04103	7	5942F	CAAGAAAGGCTGTAGATGTC	8193R	TGCCAAGTGTTGATTTGTC	6334F	TACGGTAGCAGAGACTTGGTCT	TCTAGGGGAAGGACATGGGG	6750R	ACACTGACGACATGGTTCTACA	ACTGGCAATGGTAGCAACACT
						6248R	TACGGTAGCAGAGACTTGGTCT	GGGATGTCACCAAGCTATGT	6747R	ACACTGACGACATGGTTCTACA	GGCAATGGTAGCAACACTTTT
	14	5942F	CAAGAAAGGCTGTAGATGTC	8193R	TGCCAAGTGTTGATTTGTC	6334F	TACGGTAGCAGAGACTTGGTCT	TCTAGGGGAAGGACATGGGG	6750R	ACACTGACGACATGGTTCTACA	ACTGGCAATGGTAGCAACACT
						6248R	TACGGTAGCAGAGACTTGGTCT	GGGATGTCACCAAGCTATGT	6747R	ACACTGACGACATGGTTCTACA	GGCAATGGTAGCAACACTTTT
	21	5942F	CAAGAAAGGCTGTAGATGTC	8193R	TGCCAAGTGTTGATTTGTC	6334F	TACGGTAGCAGAGACTTGGTCT	TCTAGGGGAAGGACATGGGG	6750R	ACACTGACGACATGGTTCTACA	ACTGGCAATGGTAGCAACACT
						6248R	TACGGTAGCAGAGACTTGGTCT	GGGATGTCACCAAGCTATGT	6747R	ACACTGACGACATGGTTCTACA	GGCAATGGTAGCAACACTTTT
	28	5942F	CAAGAAAGGCTGTAGATGTC	8193R	TGCCAAGTGTTGATTTGTC	6334F	TACGGTAGCAGAGACTTGGTCT	TCTAGGGGAAGGACATGGGG	6750R	ACACTGACGACATGGTTCTACA	ACTGGCAATGGTAGCAACACT
						6248R	TACGGTAGCAGAGACTTGGTCT	GGGATGTCACCAAGCTATGT	6747R	ACACTGACGACATGGTTCTACA	GGCAATGGTAGCAACACTTTT
	42	5942F	CAAGAAAGGCTGTAGATGTC	8193R	TGCCAAGTGTTGATTTGTC	6334F	TACGGTAGCAGAGACTTGGTCT	TCTAGGGGAAGGACATGGGG	6750R	ACACTGACGACATGGTTCTACA	ACTGGCAATGGTAGCAACACT
						6248R	TACGGTAGCAGAGACTTGGTCT	GGGATGTCACCAAGCTATGT	6747R	ACACTGACGACATGGTTCTACA	GGCAATGGTAGCAACACTTTT
	56	5942F	CAAGAAAGGCTGTAGATGTC	8193R	TGCCAAGTGTTGATTTGTC	6334F	TACGGTAGCAGAGACTTGGTCT	TCTAGGGGAAGGACATGGGG	6750R	ACACTGACGACATGGTTCTACA	ACTGGCAATGGTAGCAACACT
						6248R	TACGGTAGCAGAGACTTGGTCT	GGGATGTCACCAAGCTATGT	6747R	ACACTGACGACATGGTTCTACA	GGCAATGGTAGCAACACTTTT
	70	5942F	CAAGAAAGGCTGTAGATGTC	8193R	TGCCAAGTGTTGATTTGTC	6334F	TACGGTAGCAGAGACTTGGTCT	TCTAGGGGAAGGACATGGGG	6750R	ACACTGACGACATGGTTCTACA	ACTGGCAATGGTAGCAACACT
						6248R	TACGGTAGCAGAGACTTGGTCT	GGGATGTCACCAAGCTATGT	6747R	ACACTGACGACATGGTTCTACA	GGCAATGGTAGCAACACTTTT
	84	5942F	CAAGAAAGGCTGTAGATGTC	8193R	TGCCAAGTGTTGATTTGTC	6334F	TACGGTAGCAGAGACTTGGTCT	TCTAGGGGAAGGACATGGGG	6750R	ACACTGACGACATGGTTCTACA	ACTGGCAATGGTAGCAACACT
						6248R	TACGGTAGCAGAGACTTGGTCT	GGGATGTCACCAAGCTATGT	6747R	ACACTGACGACATGGTTCTACA	GGCAATGGTAGCAACACTTTT
