# Supplementary material for: The Mucosal Barrier and Anti-Viral Immune Responses can Eliminate Portions of the Viral Population during Transmission and Early Viral Growth
Source: Preprints.org preprint supplement (doi:10.20944/preprints202105.0206.v1), 2021-05-10
Supplement: Supplementary file 2 [file TableS2.xlsx]

## Sheet: Sheet1
Animal	Time Point	Rep 1	Rep 2	MH Value	Include Rep 1?	Include Rep 2?	Theoretical Input Template Range (copies/uL)
r10001	7	***	***	0.88	Yes	Yes	1.29e2-4.64e2
	14	***	***	0.95	Yes	Yes	8.36e5-3.01e6
	21	***	*	-	Yes	No	4.13e4-1.49e5
	28	***	***	0.83	Yes	Yes	1.09e4-3.93e4
	42	***	***	0.89	Yes	Yes	3.18e3-1.14e4
	56	***	***	0.98	Yes	Yes	1.72e3-6.20e3
	70	***	***	0.92	Yes	Yes	7.41e2-2.67e3
	84	***	***	0.94	Yes	Yes	9.71e1-3.50e2
r04103	7	***	***	0.89	Yes	Yes	3.91e2-1.41e3
	14	***	***	0.9	Yes	Yes	3.43e5-1.24e6
	21	***	***	0.88	Yes	Yes	6.17e4-2.22e5
	28	***	***	0.96	Yes	Yes	1.51e4-5.44e4
	42	***	***	0.86	Yes	Yes	7.59e2-2.73e3
	56	***	***	0.93	Yes	Yes	3.73e2-1.34e3
	70	***	***	0.85	Yes	Yes	8.48e1-3.05e2
	84	***	***	0.78	Yes	Yes	2.33e1-8.40e1
cy0428	7	***	***	0.538	No	No	2.21e5-7.96e5
	10	***	***	0.96	Yes	Yes	1.03e4-3.71e4
	14	***	***	0.96	Yes	Yes	1.78e5-6.40e5
	17	***	***	0.89	Yes	Yes	7.00e3-2.52e4
	21	*	***	-	No	Yes	5.52e3-1.99e4
	24	***	*	-	Yes	No	5.08e3-1.83e4
	42	*	***	-	No	Yes	5.09e3-1.84e4
	56	***	*	-	Yes	No	##
	70	***	*	-	Yes	No	1.16e3-4.16e3
	84	***	*	-	Yes	No	6.63e2-2.39e3
cy0575	3	***	***	0.198	No	No	1.94e2-7.00e2
	7	***	*	-	Yes	No	3.49e4-1.26e5
	10	***	***	0.95	Yes	Yes	1.68e6-6.04e6
	14	***	***	0.34	No	No	6.76e3-2.43e4
	17	***	*	-	Yes	No	9.36e4-3.37e5
	21	*	***	-	No	Yes	3.52e4-1.27e6
	24	***	*	-	Yes	No	2.21e3-7.96e3
	42	*	***	-	No	Yes	1.31e3-4.72e3
	56	***	*	-	Yes	No	9.14e1-3.29e2
	70	*	***	-	No	Yes	7.94e2-2.86e3
